# Supplementary material for: Co-Creating a Feasible, Acceptable and Safe Home-Based High-Intensity Interval Training Programme for People with Parkinson’s: The HIIT-Home4Parkinson’s Study
Source: MDPI journal article supplement (doi:10.3390/ijerph20095671), 2023-04-27

## Supplementary material

**Figure S1: Initial logic model proposal**

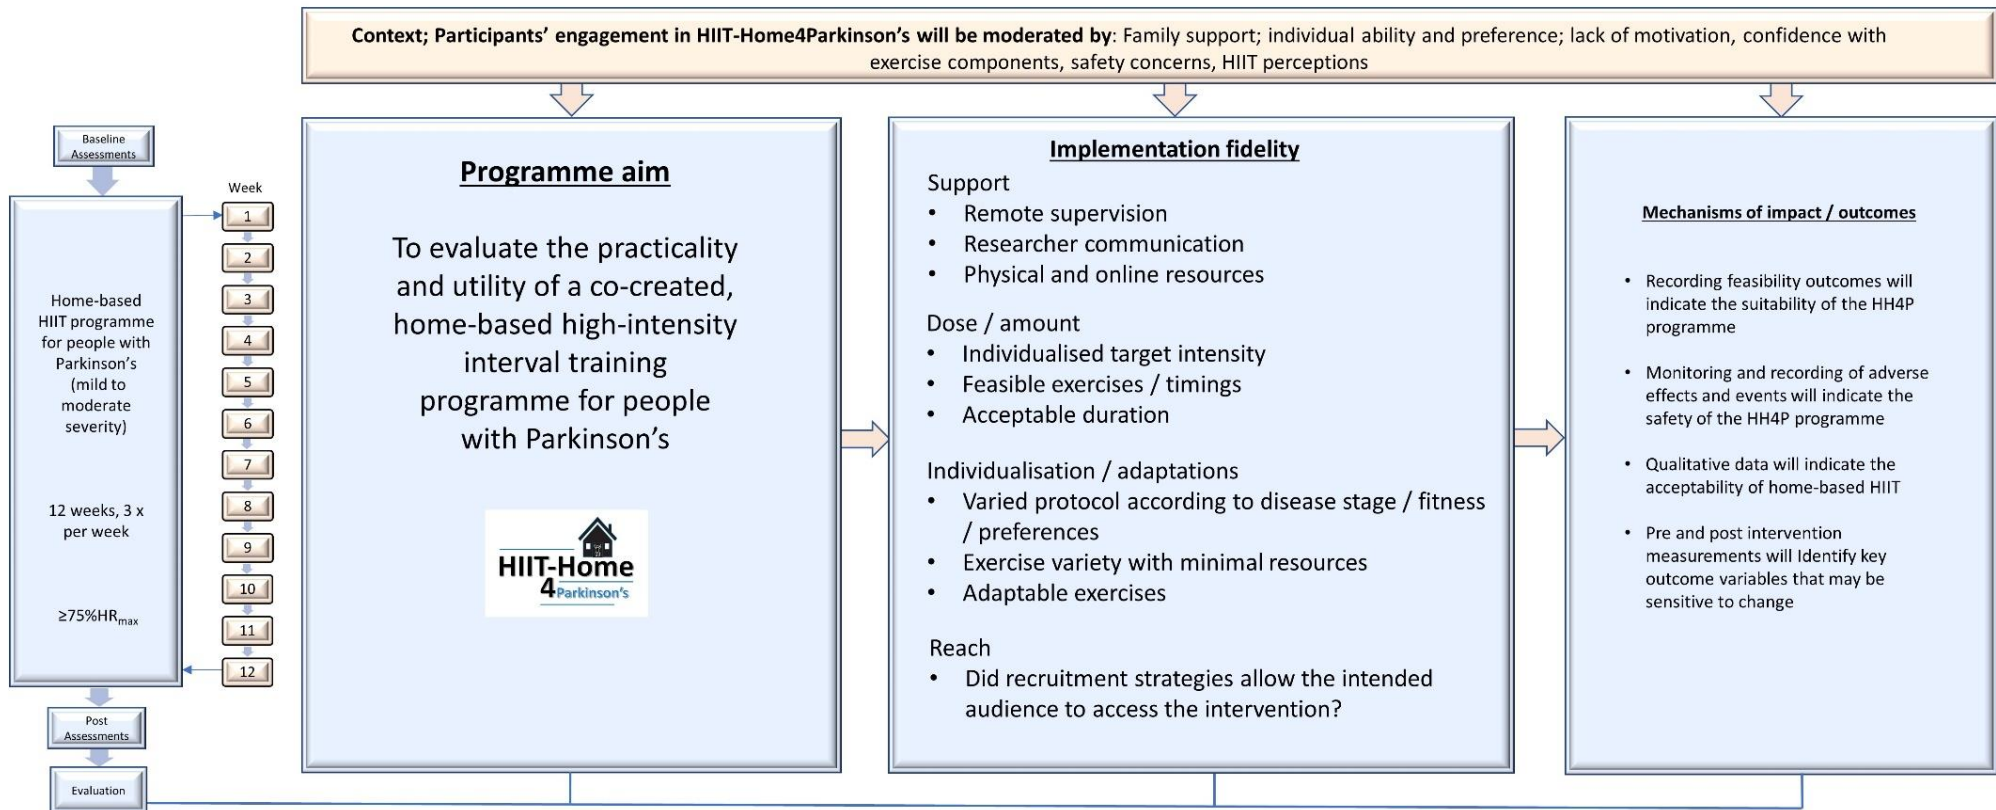

Abbreviations: HIIT – High-intensity interval training; HRmax – maximum heart rate; HH4P – HIIT-Home4Parkinson's

## Tables S1–S7: Full HIIT testing results

**Table S1: Round 1 HIIT testing results per participant**

| Participant | On / off | Sets                                       | Work : rest ratio (s) | Number of bouts completed | Mean HR (BPM) / % HR max (work phase) | Mean RPE (work phase) | Adverse effects / events | Researcher observations                                                                  |
|-------------|----------|--------------------------------------------|-----------------------|---------------------------|---------------------------------------|-----------------------|--------------------------|------------------------------------------------------------------------------------------|
| 1           | None     | Set 1. Star Jumps                          | 45 : 15               | 3                         | 114.9 / 84.5%                         | 13.0                  | None                     | -                                                                                        |
|             |          | Set 2. Front arm raises (resistance bands) | 45 : 15               | 3                         | 111.3 / 81.9%                         | 12.3                  | None                     | -                                                                                        |
|             |          | Set 3. Chair sit to stand                  | 45 : 15               | 3                         | 117.5 / 86.4%                         | 14.0                  | None                     | -                                                                                        |
|             |          | Set 4. Lateral arm raises with weights     | 45 : 15               | 3                         | 118.0 / 86.8%                         | 11.3                  | Shoulder pain            | -                                                                                        |
|             |          | Overall                                    | -                     | 12 / 12                   | 115.4 / 84.9%                         | 12.7                  | Shoulder pain in set 4   | Maintained form throughout. Completed exercises with relevant amplitude / cadence        |
| 2           | On       | Set 1. Running on the spot                 | 45 : 15               | 3                         | 127.3 / 88.4%                         | 13.7                  | None                     | -                                                                                        |
|             |          | Set 2. Front arm raises (resistance band)  | 45 : 15               | 3                         | 108.2 / 75.1%                         | 15.0                  | None                     | Amplitude of movement reduced                                                            |
|             |          | Set 3. Chair sit to stand                  | 45 : 15               | 3                         | 107.5 / 74.7%                         | 16.3                  | None                     | -                                                                                        |
|             |          | Set 4. Lateral arm raises with weights     | 45 : 15               | 3                         | 110.7 / 76.9%                         | 14.3                  | None                     | -                                                                                        |
|             |          | Overall                                    | -                     | 12 / 12                   | 113.4 / 78.8%                         | 14.8                  | None                     | Maintained frequency. Amplitude reduced periodically                                     |
| 3           | On       | Set 1. Running on the spot                 | 45 : 15               | 3                         | 116.0 / 69.9%                         | 12.0                  | None                     | Could have increased effort (unsure of required intensity)                               |
|             |          | Set 2. Boxing                              | 45 : 15               | 3                         | 126.4 / 76.1%                         | 11.3                  | None                     | Doubled frequency                                                                        |
|             |          | Set 3. Body weight squats                  | 45 : 15               | 3                         | 126.9 / 76.4%                         | 13.3                  | None                     | Doubled up on movement frequency to increase effort                                      |
|             |          | Set 4. Boxing                              | 45 : 15               | 3                         | 135.2 / 81.4%                         | 13.3                  | None                     | -                                                                                        |
|             |          | Overall                                    | -                     | 12 / 12                   | 126.1 / 76.0%                         | 12.5                  | None                     | Maintained amplitude and form. Increased effort by periodically doubling up on frequency |
| 4           | On       | Set 1. Running on the spot                 | 45 : 15               | 3                         | 141.3 / 86.7%                         | 14.3                  | Calf cramp in running    | -                                                                                        |
|             |          | Set 2. Boxing                              | 45 : 15               | 3                         | 149.0 / 91.4%                         | 15.3                  | None                     | Bounced to increase intensity                                                            |
|             |          | Set 3. Body weight squats                  | 45 : 15               | 3                         | 148.7 / 91.2%                         | 18.7                  | Knee ache in squat       | -                                                                                        |
|             |          | Set 4. Lateral arm raises with weights     | 45 : 15               | 3                         | 140.3 / 86.1%                         | 16.3                  | None                     | -                                                                                        |
|             |          | Overall                                    | -                     | 12 / 12                   | 144.8 / 88.8%                         | 16.2                  | Calf cramp / knee ache   | Squats “hard” on knees. Bounced during boxing which was observed to increase intensity   |
| 5           | On       | Set 1. Star jumps                          | 45 : 15               | 3                         | 136.3 / 87.4%*                        | 18.0                  | None                     | -                                                                                        |
|             |          | Set 2. Shoulder press with weights         | 45 : 15               | 3                         | 136.7 / 87.6%*                        | 17.0                  | None                     | -                                                                                        |
|             |          | Set 3. Body weight squats                  | 45 : 15               | 3                         | 134.3 / 86.1%*                        | 17.3                  | None                     | Imbalance and reduced movement amplitude                                                 |
|             |          | Set 4. Lateral arm raises with weights     | 45 : 15               | 3                         | 131.2 / 84.1%*                        | 17.7                  | None                     | -                                                                                        |
|             |          | Overall                                    | -                     | 12 / 12                   | 134.6 / 86.3%*                        | 17.5                  | None                     | Imbalance during squats, with reduced movement amplitude as participant tired            |

\* Based on age adjusted formula 220 - age

Abbreviations: s – seconds; m – minutes; HRmax – maximum heart rate; RPE – rate of perceived exertion; BPM – Beats per minute;

**Table S2: Round 1 HIIT testing results per exercise**

| Set / Exercise                           | Number of sets undertaken | Completion (%) | % sets achieving mean target HR | Mean % of HR <sub>max</sub> achieved | Mean RPE achieved | Adverse effects and events  | Researcher observations                                                                                |
|------------------------------------------|---------------------------|----------------|---------------------------------|--------------------------------------|-------------------|-----------------------------|--------------------------------------------------------------------------------------------------------|
| 1. Running on the spot                   | 3                         | 100            | 66.6                            | 81.7                                 | 13.3              | 1 participant calf cramp    | 1 participant unsure of required effort                                                                |
| 1. Star jumps                            | 2                         | 100            | 100                             | 86.0                                 | 16                | None                        | None                                                                                                   |
| 1. Skipping (no rope)                    | 0                         | -              | -                               | -                                    | -                 | -                           | -                                                                                                      |
| 2. Boxing (crosses & jabs)               | 2                         | 100            | 100                             | 83.8                                 | 13.3              | None                        | “Bouncing” observed to increase intensity                                                              |
| 2. Overhead shoulder press + weights     | 1                         | 100            | 100                             | 87.6                                 | 17                | None                        | None                                                                                                   |
| 2. Front arm raise + resistance band     | 2                         | 100            | 100                             | 78.5                                 | 13.7              | None                        | 1 participant reduced movement amplitude                                                               |
| 3. Body weight squats                    | 3                         | 100            | 100                             | 84.6                                 | 16.4              | 1 participant knee ache     | Balance issues (H&Y 3). Knee pain. Reduced movement amplitude. Frequency doubled to increase intensity |
| 3. Chair sit to stand                    | 2                         | 100            | 50                              | 80.6                                 | 15.2              | None                        | Unsure of position of chair. Support required                                                          |
| 4. Boxing (Uppercuts & jabs)             | 1                         | 100            | 100                             | 81.4                                 | 13.3              | None                        | None                                                                                                   |
| 4. Lateral arm raises + weights          | 4                         | 100            | 100                             | 83.5                                 | 14.9              | 1 participant shoulder pain | Shoulder pain when following shoulder exercises from set 2                                             |
| 4. Lateral arm raises + resistance bands | 0                         | -              | -                               | -                                    | -                 | -                           | -                                                                                                      |

Abbreviations: HR – Heart rate; HR<sub>max</sub> – Maximum heart rate; RPE – Rate of perceived exertion

**Table S3: Round 2 HIIT testing results per participant**

| Participant | On / off | Sets                                       | Work : rest ratio (s) | Number of bouts completed | Mean HR (BPM) / % HR max (work phase) | Mean RPE (work phase) | Adverse effects / events | Researcher observations                                                                                                                                                                                            |
|-------------|----------|--------------------------------------------|-----------------------|---------------------------|---------------------------------------|-----------------------|--------------------------|--------------------------------------------------------------------------------------------------------------------------------------------------------------------------------------------------------------------|
| 2           | Off      | Set 1. Running on the spot                 | 45 : 15               | 3                         | 128.4 / 79.8                          | 13.0                  | None                     | -                                                                                                                                                                                                                  |
|             |          | Set 2. Front arm raises (resistance bands) | 45 : 15               | 3                         | 131.3 / 81.6                          | 15.7                  | None                     | -                                                                                                                                                                                                                  |
|             |          | Set 3. Star jumps                          | 45 : 15               | 2.5                       | 138.6 / 86.1                          | 19.3                  | Shoulder pain            | Changed to jogging halfway through the final bout due to shoulder pain                                                                                                                                             |
|             |          | Set 4. Chair sit to stand                  | 45 : 15               | 3                         | 132.2 / 82.1                          | 14.3                  | None                     | Used chair supports for leverage as well as balance. Improved from previous round due to support.                                                                                                                  |
|             |          | Overall                                    | -                     | 11.5 / 12                 | 132.6 / 82.4                          | 15.6                  | Shoulder pain in set 3   | Set 2 and set 3, consecutive shoulder raises and star jumps unsuitable for this participant. Increased work rate from previous round                                                                               |
| 3           | On       | Set 1. Running on the spot                 | 45 : 15               | 3                         | 104.1 / 62.7                          | 12.0                  | None                     | -                                                                                                                                                                                                                  |
|             |          | Set 2. Boxing                              | 45 : 15               | 3                         | 109.7 / 66.1                          | 14.3                  | None                     | -                                                                                                                                                                                                                  |
|             |          | Set 3. Star jumps                          | 45 : 15               | 3                         | 110.5 / 66.6                          | 14.7                  | None                     | -                                                                                                                                                                                                                  |
|             |          | Set 4. Bodyweight squats                   | 45 : 15               | 3                         | 126.0 / 75.9                          | 15.7                  | None                     | Overbalanced forward during squats                                                                                                                                                                                 |
|             |          | Overall                                    | -                     | 12 / 12                   | 112.6 / 67.8                          | 14.2                  | None                     | Postponed for 90 minutes to wait for the “on” phase. Difficulty in maintaining rhythm in sets 1 and 2. Overbalancing forward during squats (on tip toes). Lunges may have been more suitable for this participant. |
| 4           | On       | Set 1. Running on the spot                 | 45 : 15               | 3                         | 111.1 / 68.2                          | 10.3                  | None                     | -                                                                                                                                                                                                                  |
|             |          | Set 2. Boxing                              | 45 : 15               | 3                         | 123.9 / 76.0                          | 16.0                  | None                     | Bounced during boxing to increase intensity                                                                                                                                                                        |
|             |          | Set 3. Skipping (no rope)                  | 45 : 15               | 3                         | 138.9 / 85.2                          | 16.0                  | None                     | -                                                                                                                                                                                                                  |
|             |          | Set 4. Forward lunges                      | 45 : 15               | 3                         | 123.0 / 75.5                          | 15.3                  | None                     | Lunges suitable                                                                                                                                                                                                    |
|             |          | Overall                                    | -                     | 12 / 12                   | 124.2 / 76.2                          | 14.4                  | None                     | “Bounced” to increase intensity. Lunges observed to be suitable for this participant.                                                                                                                              |

Abbreviations: s – seconds; m – minutes; HRmax – maximum heart rate; RPE – rate of perceived exertion; BPM – Beats per minute;

Table S4: Round 2 HIIT testing results per exercise

| Set / Exercise                       | Number of sets undertaken | Completion (%) | % sets achieving mean target HR | Mean % of HR <sub>max</sub> achieved | Mean RPE achieved | Adverse effects and events | Researcher observations                                                   |
|--------------------------------------|---------------------------|----------------|---------------------------------|--------------------------------------|-------------------|----------------------------|---------------------------------------------------------------------------|
| 1 / 3. Running on the spot           | 3                         | 100            | 33                              | 70.2                                 | 11.8              | -                          | One participant had difficulty synchronising movements to audio           |
| 1 / 3. Star jumps                    | 2                         | 92             | 50                              | 76.4                                 | 17.0              | Shoulder pain              | Shoulder pain in set 3 following raises                                   |
| 1 / 3. Skipping (no rope)            | 1                         | 100            | 100                             | 85.2                                 | 16.0              | -                          |                                                                           |
| 2. Boxing (crosses & jabs)           | 2                         | 100            | 50                              | 71.1                                 | 15.2              | -                          | Bouncing increased intensity. Difficulty synchronising movements to audio |
| 2. Overhead shoulder press + weights | -                         | -              | -                               | -                                    | -                 | -                          | -                                                                         |
| 2. Front arm raise + resistance band | 1                         | 100            | 100                             | 81.6                                 | 15.7              | -                          | -                                                                         |
| 4. Body weight squats                | 1                         | 100            | 100                             | 75.9                                 | 15.7              | -                          | Overbalancing forward                                                     |
| 4. Chair sit to stand                | 1                         | 100            | 100                             | 82.1                                 | 14.3              | -                          | Balance aids used for leverage                                            |
| 4. Forward lunges                    | 1                         | 100            | 100                             | 75.5                                 | 15.3              | -                          | Suitable alternative                                                      |

Abbreviations: HR – Heart rate; HR<sub>max</sub> – Maximum heart rate; RPE – Rate of perceived exertion

**Table S5: Round 3 HIIT testing results per participant**

| Participant | On / off | Sets                       | Work : rest ratio (s) | Number of bouts completed | Mean HR (BPM) / % HR max (work phase) | Mean RPE (work phase) | Adverse effects / events | Researcher observations                                                                                                            |
|-------------|----------|----------------------------|-----------------------|---------------------------|---------------------------------------|-----------------------|--------------------------|------------------------------------------------------------------------------------------------------------------------------------|
| 1           | Off      | Set 1. Star jumps          | 45 : 15               | 3                         | 103.1 / 75.1                          | 14.3                  | None                     | -                                                                                                                                  |
|             |          | Set 2. Front arm raises    | 45 : 15               | 3                         | 109.3 / 80.1                          | 13.7                  | None                     | -                                                                                                                                  |
|             |          | Set 3. Skipping (no rope)  | 45 : 15               | 3                         | 119.2 / 87.6                          | 13.7                  | None                     | -                                                                                                                                  |
|             |          | Set 4. Body weight squats  | 45 : 15               | 3                         | 116.7 / 85.8                          | 14.7                  | None                     | -                                                                                                                                  |
|             |          | Overall                    | -                     | 12 / 12                   | 112.1 / 82.4                          | 14.1                  | None                     | Exercises and sequence suitable. Good form maintained. Suitable exercises for environment. Carpet suitable surface, trainers worn. |
| 4           | On       | Set 1. Running on the spot | 45 : 15               | 3                         | 127.2 / 78.2                          | 12.0                  | None                     | -                                                                                                                                  |
|             |          | Set 2. Boxing              | 45 : 15               | 3                         | 142.0 / 87.1                          | 13.3                  | None                     | -                                                                                                                                  |
|             |          | Set 3. Star jumps          | 45 : 15               | 3                         | 144.4 / 88.6                          | 15.3                  | None                     | -                                                                                                                                  |
|             |          | Set 4. Body weight squats  | 45 : 15               | 3                         | 134.6 / 82.6                          | 16.0                  | Mild knee ache           | Shallowed squats                                                                                                                   |
|             |          | Overall                    | -                     | 12 / 12                   | 137.1 / 84.1                          | 14.2                  | None                     | Carpet suitable surface. Performed in bear feet. Shallowed squats to accommodate knee ache. Maintained form throughout otherwise   |

Abbreviations: s – seconds; m – minutes; HRmax – maximum heart rate; RPE – rate of perceived exertion; BPM – Beats per minute;

**Table S6: Round 3 HIIT testing results per exercise**

| Set / Exercise                       | Number of sets undertaken | Completion (%) | % sets achieving mean target HR | Mean % of HR <sub>max</sub> achieved | Mean RPE achieved | Adverse effects and events | Researcher observations                  |
|--------------------------------------|---------------------------|----------------|---------------------------------|--------------------------------------|-------------------|----------------------------|------------------------------------------|
| 1 / 3. Running on the spot           | 1                         | 100            | 100                             | 78.2                                 | 12.0              | None                       | -                                        |
| 1 / 3. Star jumps                    | 2                         | 100            | 100                             | 81.6                                 | 14.8              | None                       | -                                        |
| 1 / 3. Skipping (no rope)            | 1                         | 100            | 100                             | 87.6                                 | 13.7              | None                       | -                                        |
| 2. Boxing                            | 1                         | 100            | 100                             | 87.1                                 | 13.3              | None                       | -                                        |
| 2. Overhead shoulder press + weights | -                         | -              | -                               | -                                    | -                 | -                          | -                                        |
| 2. Front arm raises                  | 1                         | 100            | 100                             | 80.1                                 | 13.7              | None                       | -                                        |
| 4. Body weight squats                | 2                         | 100            | 100                             | 84.2                                 | 15.4              | Mild knee ache             | Pain subsided when squats were shallowed |
| 4. Chair sit to stand                | -                         | -              | -                               | -                                    | -                 | -                          | -                                        |
| 4. Forward lunges                    | -                         | -              | -                               | -                                    | -                 | -                          | -                                        |

Abbreviations: HR – Heart rate; HR<sub>max</sub> – Maximum heart rate; RPE – Rate of perceived exertion

Table S7: Culminated HIIT testing results per exercise (excluding shoulder exercises that were removed from the protocol)

| Set / Exercise                       | Number of sets | Set completion (%) | % sets (n) achieving mean target HR | Mean % of HR <sub>max</sub> achieved | Mean RPE achieved | Adverse effects and events |
|--------------------------------------|----------------|--------------------|-------------------------------------|--------------------------------------|-------------------|----------------------------|
| 1 / 3. Running on the spot           | 7              | 100                | 57 (4/7)                            | 76.3                                 | 12.5              | Calf cramp                 |
| 1 / 3. Star jumps                    | 6              | 98.7               | 83 (5/6)                            | 81.4                                 | 15.8              | Shoulder pain              |
| 1 / 3. Skipping (no rope)            | 2              | 100                | 100 (2/2)                           | 86.4                                 | 14.9              | None                       |
| 2. Boxing                            | 5              | 100                | 80 (4/5)                            | 79.3                                 | 14.0              | None                       |
| 2. Overhead shoulder press + weights | 1              | 100                | 100 (1/1)                           | 87.6                                 | 17.0              | None                       |
| 2. Front arm raise + resistance band | 4              | 100                | 100 (4/4)                           | 79.7                                 | 14.2              | None                       |
| 4. Body weight squats                | 6              | 100                | 100 (6/6)                           | 83.0                                 | 16.0              | Knee ache                  |
| 4. Chair sit to stand                | 3              | 100                | 67 (2/3)                            | 81.1                                 | 14.9              | None                       |
| 4. Forward lunges                    | 1              | 100                | 100 (1/1)                           | 75.5                                 | 15.3              | None                       |

Abbreviations: HR – Heart rate; HR<sub>max</sub> – Maximum heart rate; RPE – Rate of perceived exertion



## **Tables S8–S16: Examples of focus group transcript data**

**Table S8: PPI focus group 1 relating to “Concerns” sub-themes**

| <b>Main theme</b>                  | <b>Sub-theme</b>     | <b>Examples of focus group transcript data</b>                                                                                                        |
|------------------------------------|----------------------|-------------------------------------------------------------------------------------------------------------------------------------------------------|
| <b>HIIT exercise concerns</b>      | Time restraints      | “You’ve still got to live and have got lives...it’s trying to fit it all in...”                                                                       |
|                                    | Individual capacity  | “I think it would depend on the individual, concerning where you are at when you start...”                                                            |
|                                    | On / off periods     | “You also have the issue of your on / off periods, timing it to fit it in...”                                                                         |
|                                    | Space restraints     | “The point is where do you do it...if you’ve got a small home?”                                                                                       |
|                                    | Coordination         | “When you try and do legs and arms, I know other people have found it difficult as well, trying to coordinate both of those things at the same time.” |
| <b>Programme delivery concerns</b> | Supervision / injury | “My thought would be am I doing it properly...because you are not being supervised?”                                                                  |
|                                    | Motivation           | “Yes...it’s motivation with me. It’s too easy for other things to get in the way.”                                                                    |
|                                    | No social element    | “In an ideal world, I’d like to be able to go somewhere so that it becomes a social thing...”                                                         |
|                                    | Screening            | “So would you screen for comorbidities?”                                                                                                              |

Table S9: PPI focus group 1 relating to “Opportunities / motivators” sub-themes

| Main theme                                           | Sub-theme                         | Examples of focus group transcript data                                                                                                                                             |
|------------------------------------------------------|-----------------------------------|-------------------------------------------------------------------------------------------------------------------------------------------------------------------------------------|
| <b>HIIT exercise opportunities / motivators</b>      | Mode                              | “I’m part of a group that’s just been set up for boxing based on coordination, muscle memory and exercise...<br>...everyone in the group is really enjoying it, finding it useful.” |
|                                                      | Intervals                         | “It seems to be similar intervals to what we’ve been doing which seems to work.”                                                                                                    |
|                                                      | Adaptations                       | “We could look at progressing the time (of work periods) maybe more so than the intensity...”                                                                                       |
|                                                      | Equipment                         | “Resistance bands...” (Would be good to include),<br>“Handheld weights”                                                                                                             |
| <b>Programme delivery opportunities / motivators</b> | Home-based convenience            | “If you can do it in your home, you are perhaps more likely to find that little block of half an hour and get on with it and do it.”                                                |
|                                                      | Remote support                    | “It’s useful to have some online guidance. I thought a video showing good form and a video showing bad form.”                                                                       |
|                                                      | Evidence of change as a motivator | “Yeah, if you see good enough change...that would be your motivator.”                                                                                                               |
|                                                      | Duration / frequency              | “I think the 12 weeks is quite good because then all of us can then try to devote the next 12 weeks as much as possible.”                                                           |
|                                                      | Monitoring equipment              | “I’ve got a fit bit...it’s got a heart monitor on it...”                                                                                                                            |

Table S10: Clinician focus group 1 relating to “Barriers and considerations” sub-themes

| Main theme                                       | Sub-theme                            | Examples of focus group transcript data                                                                                                                                                             |
|--------------------------------------------------|--------------------------------------|-----------------------------------------------------------------------------------------------------------------------------------------------------------------------------------------------------|
| <b>HIIT exercise barriers and considerations</b> | Parkinson’s severity differentiation | “You have to think about what you are providing for 1’s and 2’s, is not what you are providing for 3’s and 4’s on the Hoehn and Yahr scale.”                                                        |
|                                                  | Reduced movement amplitude           | “Because there is that cognitive issue of trying to keep each movement the same size when you are repeating movements – the first one is big, the second is okay and the third is a bit smaller...” |
| <b>Programme delivery concerns</b>               | Remote support                       | “Few people have got a DVD player”, “Paper copies of the exercises - it’s not enthusing people.”                                                                                                    |
|                                                  | Licensing                            | “Just thinking about music licensing...it can be tricky.”<br>“There’s a lot of rules and regulations.”                                                                                              |
|                                                  | Motivation                           | “It’s motivation then, the social side, that’s a bit more tricky.”                                                                                                                                  |
|                                                  | Outcome measures (PDQ)               | “Almost all of the (exercise) interventions were not long enough to make a difference to the PDQ.”                                                                                                  |
|                                                  | Physio costs                         | “The big cost is always the physio time...”                                                                                                                                                         |

Table S11: Clinician focus group 1 relating to “Opportunities and facilitators” sub-themes

| Main theme                                             | Sub-theme                             | Examples of focus group transcript data                                                                                                                                                                    |
|--------------------------------------------------------|---------------------------------------|------------------------------------------------------------------------------------------------------------------------------------------------------------------------------------------------------------|
| <b>HIIT exercise opportunities and facilitators</b>    | Rhythmic cueing                       | “I think if it was cued to a beat of some kind you’d get a bigger volume (amplitude) of movement.”<br>“Have the music for the appropriate number of seconds, and the right beat...”                        |
|                                                        | Differentiation                       | “It might be the prep (aration) that’s different, the lead in might be much longer before you get to the high intensity.” “You could have a choice of similar. exercises...”                               |
|                                                        | Modality                              | “Core stability and posture (in the warm-up) would be the focus for me...”<br>“I could understand the boxing...and you could add the coordination...”                                                      |
| <b>Programme delivery opportunities and motivators</b> | Remote support                        | “If you have the initial training, maybe say that every couple of weeks there is a check-in with a physiotherapist?”<br>“People can download the exercises they need and have a folder on their tablet...” |
|                                                        | Outcome measures; change / motivation | “Your outcome measures are going to need to include something that is meaningful to them (service users), and that they can measure really easily.”                                                        |
|                                                        | Training                              | I would front load it...and then I think your supervision could drop right off. I would suggest once they’ve got it they’ve got it.”                                                                       |
|                                                        | Social motivation                     | “But as they start as a group, could they maybe check-in as a group?”                                                                                                                                      |

Table S12: PPI focus group 2 relating to “outcomes” and “randomisation”

| Main theme                                             | Sub-theme                                                                      | Examples of focus group transcript data                                                                                                        |
|--------------------------------------------------------|--------------------------------------------------------------------------------|------------------------------------------------------------------------------------------------------------------------------------------------|
| <b>Outcome measures – acceptability and importance</b> | Brain-derived neurotrophic factor acceptable and important                     | “No problem with that, that’s acceptable, I’m used to it...” (Blood tests)                                                                     |
|                                                        | VO <sub>2max</sub> acceptable procedure                                        | “It was fine the first time, no problem with that...”                                                                                          |
|                                                        | Physical activity, 2 weeks accelerometry acceptable                            | “I’d certainly wear one (accelerometer). I’d be quite happy wearing something on the waist band.”                                              |
|                                                        | 30 second sit to stand acceptable but not suitable as fortnightly “motivator”  | “The fitness thing, it’s good to see it’s making a difference...but what we really want to know is it slowing the progression of Parkinson’s?” |
|                                                        | Rate of perceived exertion concern with judgement                              | “That was the one I had concerns that I was giving the right information...”                                                                   |
|                                                        | Unified Parkinson’s Disease Rating Scale part III important and acceptable     | “That would be a good idea. You have to show that it’s (exercise) is having a benefit over and above making you fitter.”                       |
|                                                        | Adherence, completion, adverse effects and events self-report diary acceptable | “No problem, as long as it’s fairly simple stuff...”                                                                                           |
|                                                        | Ox-PAQ important and acceptable                                                | “I think it’s useful, from the point of view of monitoring where we are with Parkinson’s.”                                                     |
| <b>Randomisation</b>                                   | Unacceptable for 1/3 participants                                              | “Disappointed to be honest, I’d want to be on the exercise side I’m afraid.”                                                                   |

Table S13: PPI focus group 2 relating to “HIIT protocol”

| Main theme                                                    | Sub-theme                                                                     | Examples of focus group transcript data                                                                                                      |
|---------------------------------------------------------------|-------------------------------------------------------------------------------|----------------------------------------------------------------------------------------------------------------------------------------------|
| <b>Specific points regarding the undertaken HIIT protocol</b> | General thoughts, challenging and enjoyable                                   | “I enjoyed it. It was quite tough at the end, but yeah it was good.”                                                                         |
|                                                               | Alternative exercises – core exercises, leg raises                            | “Maybe include something that works the core muscles?”                                                                                       |
|                                                               | Accompaniment acceptable, but requires variation                              | “It (differing musical styles) would also suit our moods, to encourage us...”                                                                |
|                                                               | Pre-recorded verbal encouragement acceptable                                  | “I don’t have a problem with that. It keeps you motivated.”                                                                                  |
|                                                               | Visible heart rate monitor acceptable and useful                              | “When you get used to the training you would be able to feel that you are working at the right intensity, but maybe until that point?”       |
|                                                               | Squats & sit to stand require support / fixture and fittings damage potential | “If you are repeatedly doing it (sit to stand) the chair works backwards...”<br>“Putting the chair against the wall, am I going to mark it?” |

Table S14: Clinician focus group 2 relating to “outcomes” and “programme delivery”

| Main theme                | Sub-theme                                                  | Examples of focus group transcript data                                                              |
|---------------------------|------------------------------------------------------------|------------------------------------------------------------------------------------------------------|
| <b>Outcome measures</b>   | Fortnightly motivational check- in                         | “I think these motivational chats, when you do contact and motivate it’s really lovely...”           |
|                           | Range of outcomes to allow for individualised motivation   | “Maybe for some fitness is the goal, for others it might be about how many stairs they can go up...” |
|                           | Additional motivational check-ins resource intensive       | “These (check-ins) will add to researcher time...”                                                   |
|                           | Goal Attainment Scale achievable procedure but problematic | “The GAS (Goal Attainment Scale) is difficult to standardise...”                                     |
| <b>Programme delivery</b> | Proposed programme has multiple options                    | “It sounds comprehensive. It’s not one size fits all, so you’ve got options there for people.”       |
|                           | Ensure choice of options to avoid overloading              | “Make it clear that they don’t have to do all of them at once.”                                      |
|                           | Use of Smart phone application                             | “Participants could use their phone, that would be ideal...”                                         |

Table S15: Clinician focus group 2 relating to “HIIT protocol”

| Main theme                                         | Sub-theme                                                 | Examples of focus group transcript data                                                                                                                    |
|----------------------------------------------------|-----------------------------------------------------------|------------------------------------------------------------------------------------------------------------------------------------------------------------|
| <b>Specific points regarding the HIIT protocol</b> | Squats and sit-to-stand balance safety and alternatives   | “Maybe go for single leg lunges, so you’ve got that one flat foot?”<br>“You could hold on to a chair, or near a wall...”                                   |
|                                                    | Core exercises stimulate inadequate intensity             | “I’m not sure you’d get your heart rate up doing that...”<br>(Core exercises)                                                                              |
|                                                    | Shoulder exercises overly similar                         | “It’s not so much about the shoulder exercises per se, it’s because they are in the same direction...”                                                     |
|                                                    | Alternative exercises to facilitate clinical prescription | “As a therapist you could say pick the one you are happy with...”                                                                                          |
|                                                    | Exercise sequence alternatives                            | I think the upper body, lower body (sequence) is fine, just mix it up a bit.”<br>You could do cardio, something different, cardio, something different...” |



Table S16: PPI focus group 3 relating to “Increase engagement” and “Reduce engagement” in the HH4P developed exercise protocol

| Main theme                 | Sub-theme                                                                           | Examples of focus group transcript data                                                                                                                                 |
|----------------------------|-------------------------------------------------------------------------------------|-------------------------------------------------------------------------------------------------------------------------------------------------------------------------|
| <b>Increase engagement</b> | Additional opportunities within initial home visit:<br>Environment / required space | “I think that’s a really key thing to be worked out in that initial home visit. Where is this going to happen? What have you got on the floor? What’s surrounding you?” |
|                            | Additional opportunities within initial home visit:<br>Engagement with partner      | “Going into people’s homes...explain what they should be doing and the benefits to the partner...”                                                                      |
|                            | Partner support                                                                     | “I’d want to know what she (exercise participant) was doing and how she should be doing it.”                                                                            |
|                            | Potential to exercise outside                                                       | “If it was a nice day I would do the exercise outside...”                                                                                                               |
| <b>Reduce engagement</b>   | Exercise environment: Surface                                                       | I just feel, if your feet stick to it (carpet), you can’t swivel of move so freely on it...”                                                                            |
|                            | Exercise environment: Space                                                         | “You haven’t got quite the width of the room. I’d be worried about running into the cupboards!”                                                                         |
|                            | Exercise environment: Damage                                                        | “When I wear a hole in the carpet I’ll be looking for contributions!”                                                                                                   |
|                            | Lack of partner support                                                             | “They (partners) might turn around and say it’s nothing to do with me...”                                                                                               |
|                            | Motivation                                                                          | “It depends on your attitude. I mean I’m all fight, but a lot of people aren’t...”                                                                                      |
|                            | Footwear                                                                            | “So I put trainers on and I’ll be sticking to the floor to start with.”                                                                                                 |

## Figures S2–S6: Graphical examples of participant heart rate data (HIIT round 1)

Figure S2: Participant 1

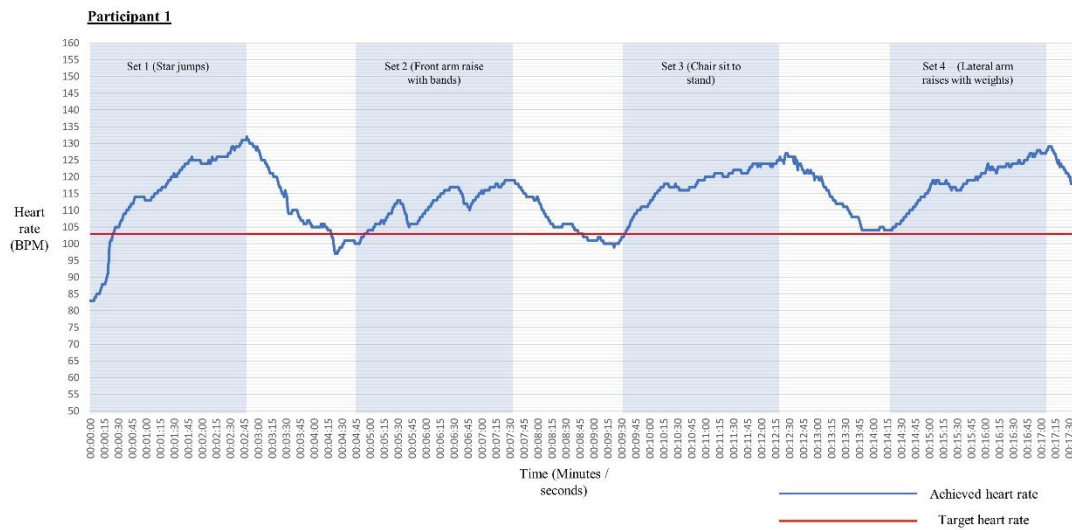

Figure S3: Participant 2

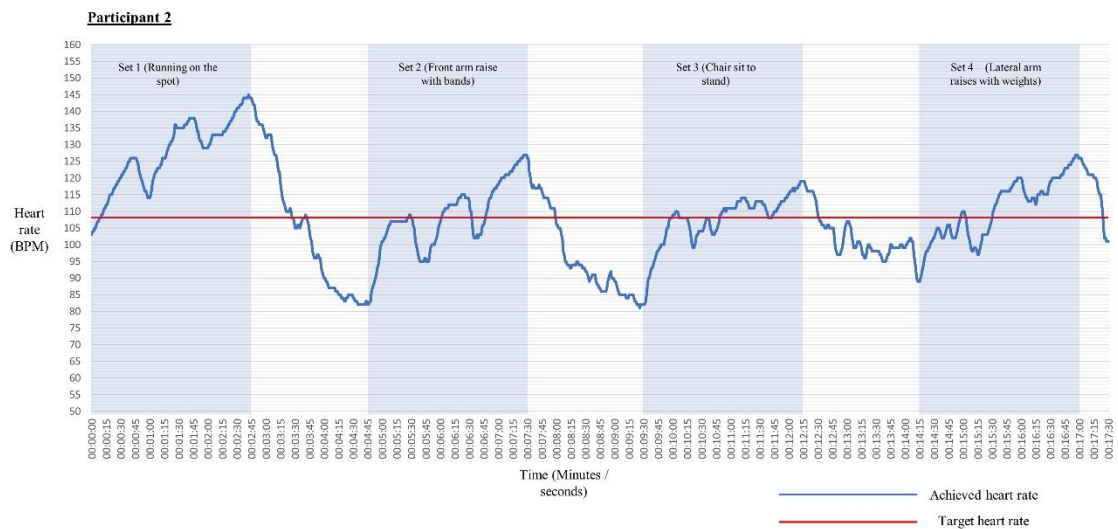

Figure S4: Participant 3

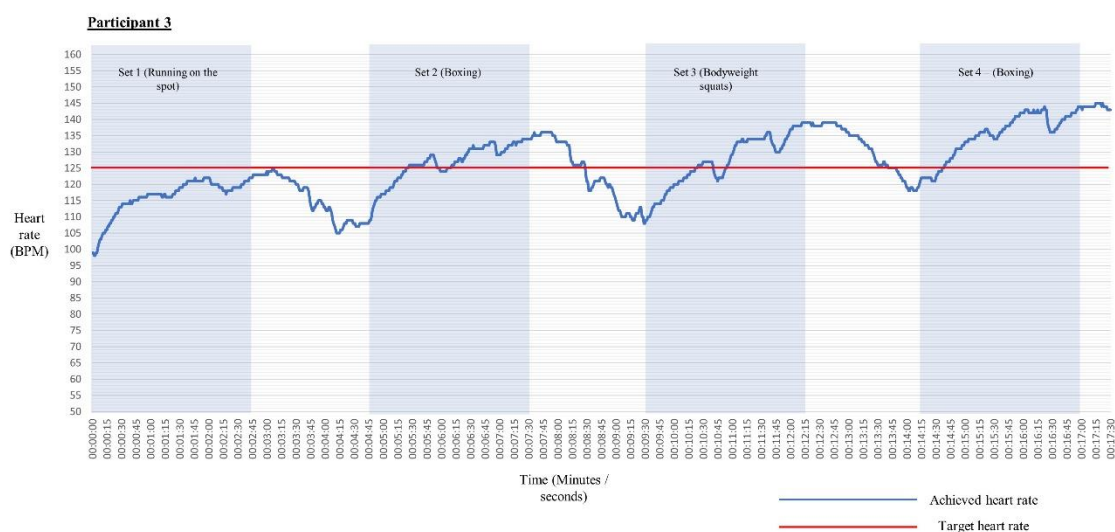

Figure S5: Participant 4

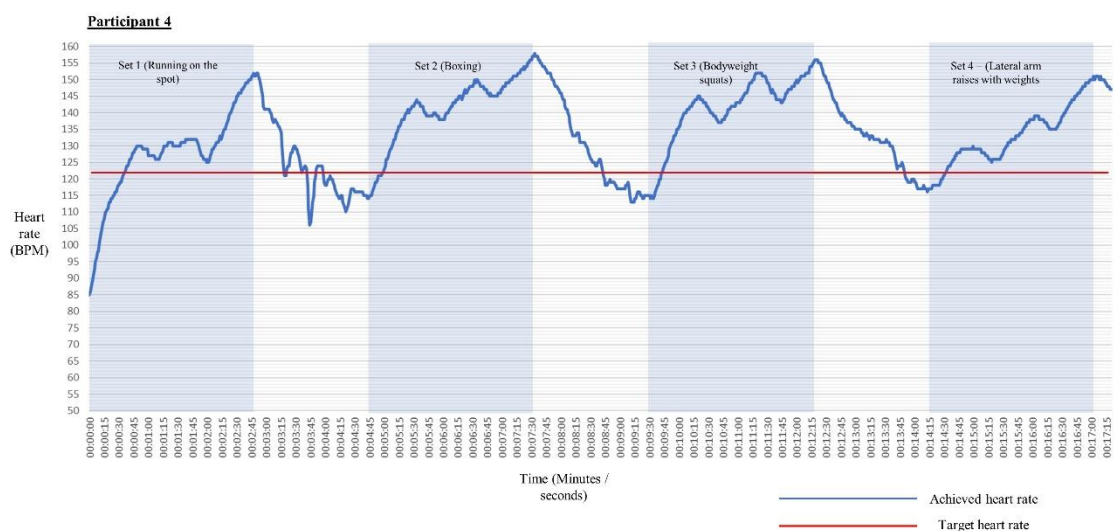

Figure S6: Participant 5

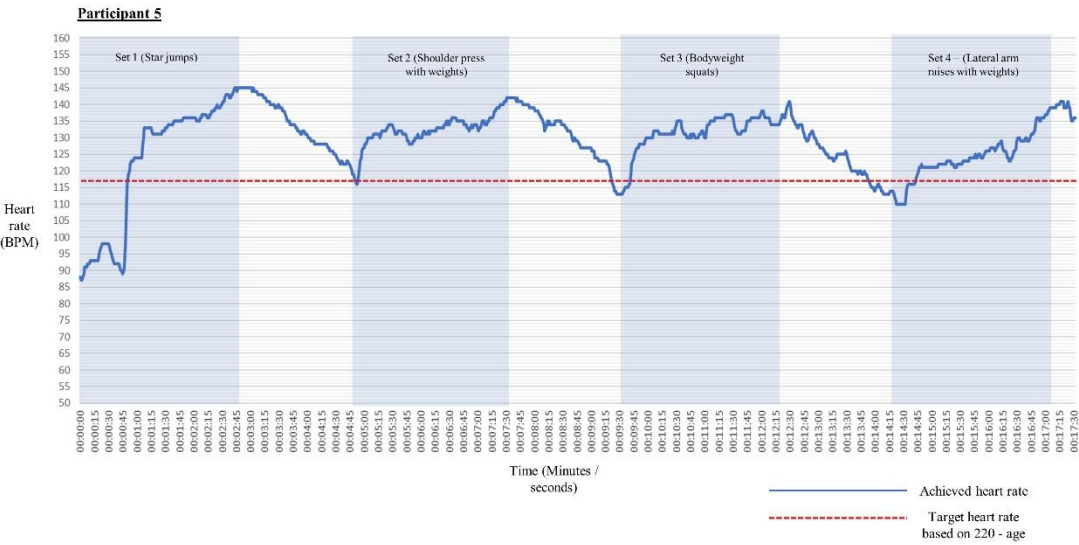

Supplement: s1 [file s1]
